# Supplementary material for: Depression and Personality Traits Across Adolescence—Within-Person Analyses of a Birth Cohort
Source: Springer Nature journal article supplement (doi:10.1007/s10802-024-01188-8), 2024-03-28
Supplement: MOESM1 [file 26920126]

**Figure S1**

*Flow chart of recruitment and follow-up*

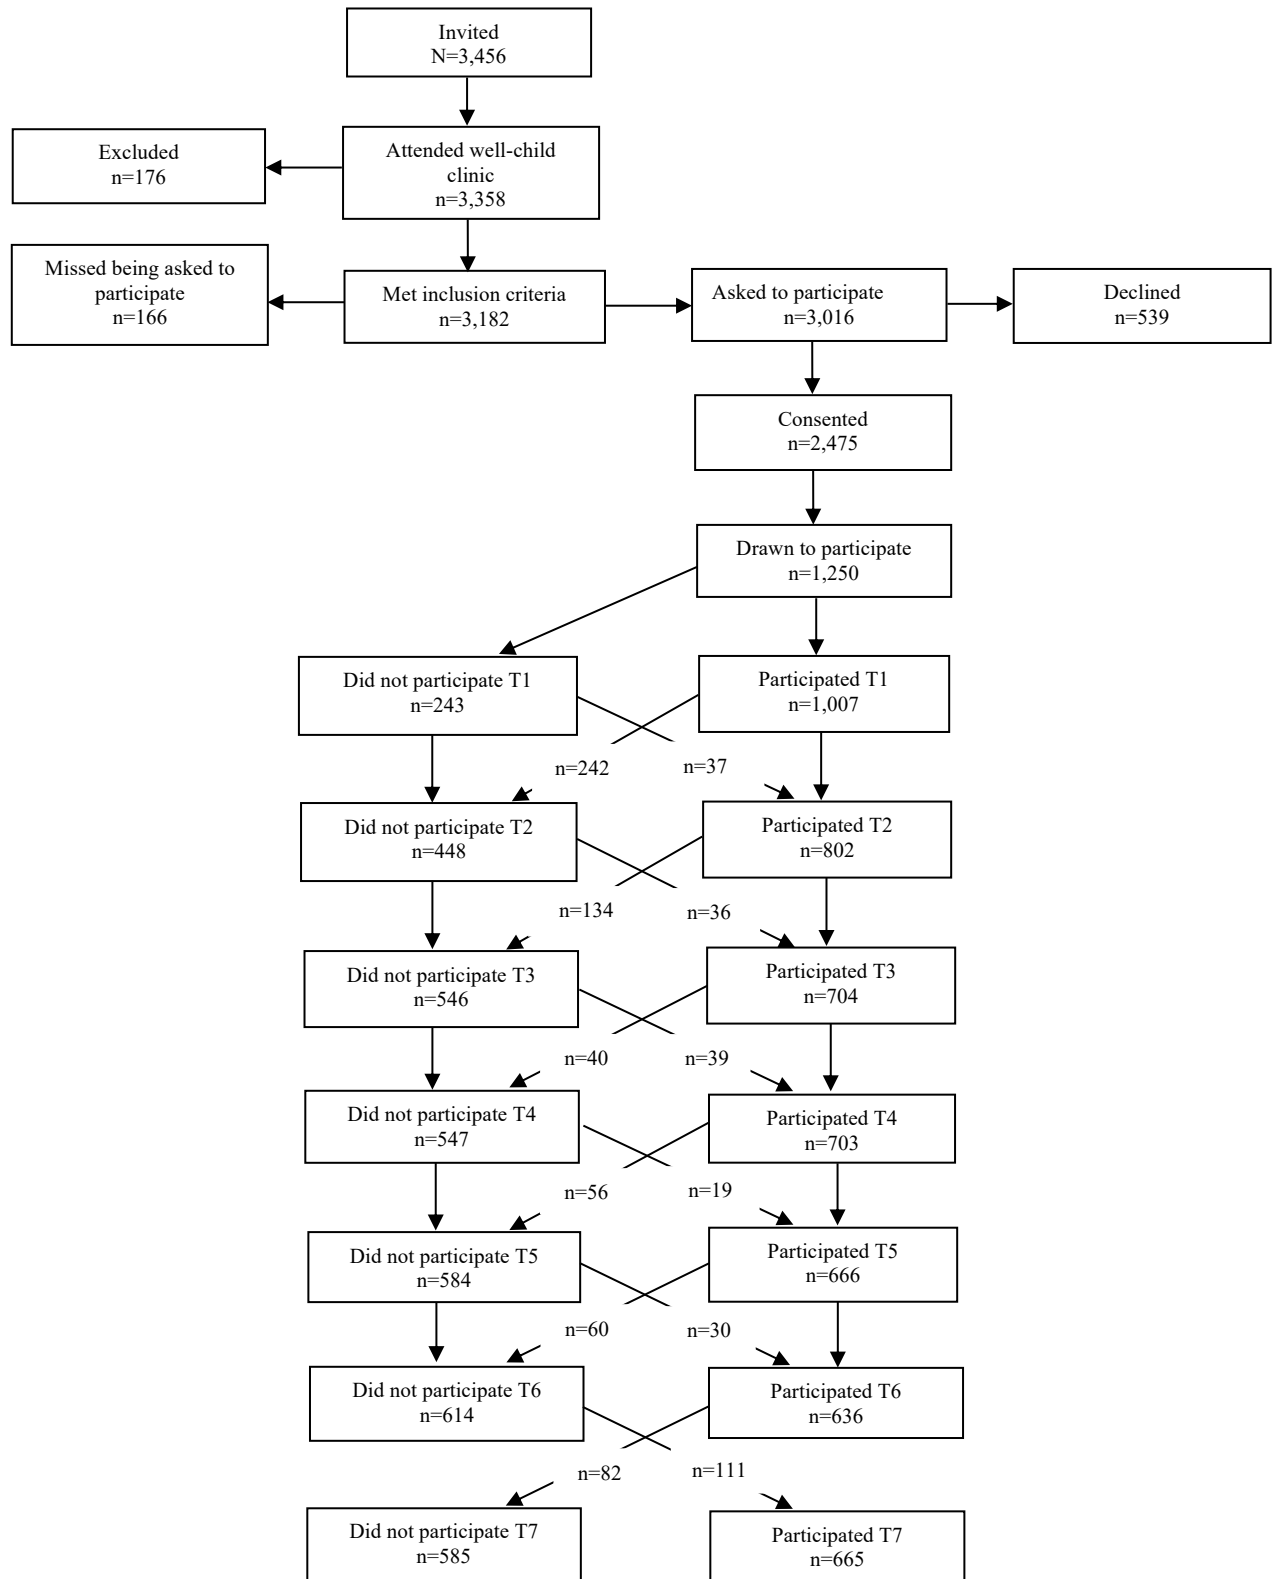

*Note.* Number of participants at the various assessment points is based on the number of participants invited to participate ( $n = 1,250$ ) minus those who did not participate at the respective measurement point (i.e., T1, T2).
